# Supplementary material for: Assessment of Age-Related Changes on Masticatory Function in a Population with Normal Dentition
Source: MDPI journal article supplement (doi:10.3390/ijerph18136899), 2021-06-27
Supplement: s1 [file supplementary files_tables_IJERPH_김선희(최종).pdf › supplementary files_tables_IJERPH_김선희(최종).pdf]

Table S1. Multiple linear regression analysis of factors associated with masticatory performance

|       |            | Univariate |        |                   |       | Multivariate   |        |        |                  |        |                |
|-------|------------|------------|--------|-------------------|-------|----------------|--------|--------|------------------|--------|----------------|
|       |            | B          | β      | 95% CI            | p     | R <sup>2</sup> | B      | β      | 95% CI           | p      | R <sup>2</sup> |
| 20-45 | Age        | 1.715      | 0.229  | -0.381 - 3.811    | 0.107 | 0.052          |        |        |                  |        |                |
|       | Gender (M) | 1          |        | ref               |       |                |        |        |                  |        |                |
|       | Gender (F) | -4.038     | -0.037 | -35.775 - 27.698  | 0.799 | 0.001          |        |        |                  |        |                |
|       | RT         | -6.073     | -0.172 | -16.034 - 3.889   | 0.226 | 0.030          |        |        |                  |        |                |
|       | FTUs       | -6.313     | -0.091 | -26.163 - 13.537  | 0.526 | 0.008          |        |        |                  |        |                |
|       | TP         | -0.958     | -0.187 | -2.400 - 0.483    | 0.188 | 0.035          |        |        |                  |        |                |
|       | HG         | 0.575      | 0.108  | -0.944 - 2.094    | 0.451 | 0.012          |        |        |                  |        |                |
|       | PBA        | 1.297      | 0.299  | 0.108 - 2.485     | 0.033 | 0.089          | 1.164  | 0.268  | 0.032 - 2.296    | 0.044* | 0.198          |
|       | ABA        | -0.765     | -0.033 | -7.496 - 5.967    | 0.820 | 0.001          |        |        |                  |        |                |
|       | BF         | 0.033      | 0.261  | -0.002 - 0.068    | 0.064 | 0.068          |        |        |                  |        |                |
|       | MTM        | 3.639      | 0.174  | -2.275 - 9.554    | 0.222 | 0.030          |        |        |                  |        |                |
|       | FIA        | 2.450      | 0.128  | -2.983 - 7.884    | 0.369 | 0.016          |        |        |                  |        |                |
|       | OHIP-14    | -3.144     | -0.356 | -5.512 - -0.777   | 0.010 | 0.127          | -2.926 | -0.332 | -5.229 - -0.623  | 0.014* |                |
|       | Tooth wear | 44.296     | 0.155  | -36.497 - 125.089 | 0.276 | 0.024          |        |        |                  |        |                |
| 45-60 | Age        | 0.235      | 0.014  | -4.328 - 4.797    | 0.918 | 0.000          |        |        |                  |        |                |
|       | Gender (M) | 1          |        | ref               |       |                |        |        |                  |        |                |
|       | Gender (F) | -26.904    | -0.198 | -63.879 - 10.071  | 0.150 | 0.039          |        |        |                  |        |                |
|       | RT         | 19.478     | 0.301  | 2.311 - 36.645    | 0.027 | 0.091          | -1.848 | -0.043 | -15.495 - 11.800 | 0.790  | 0.106          |
|       | FTUs       | 26.444     | 0.284  | 1.563 - 51.326    | 0.038 | 0.080          | 1.015  | 0.018  | -16.639 - 18.669 | 0.910  |                |
|       | TP         | 2.303      | 0.354  | 0.608 - 3.997     | 0.009 | 0.125          | -0.170 | -0.032 | -0.943 - 0.603   | 0.664  |                |
|       | HG         | 1.346      | 0.171  | -0.806 - 3.498    | 0.215 | 0.029          |        |        |                  |        |                |
|       | PBA        | 2.316      | 0.412  | 0.891 - 3.741     | 0.002 | 0.170          | 1.146  | 0.219  | -0.308 - 2.599   | 0.122  |                |
|       | ABA        | -2.037     | -0.176 | -5.215 - 1.142    | 0.204 | 0.031          |        |        |                  |        |                |
|       | BF         | 0.066      | 0.420  | 0.026 - 0.106     | 0.002 | 0.176          | 0.012  | 0.087  | -0.026 - 0.051   | 0.527  |                |
|       | MTM        | 8.014      | 0.311  | 1.193 - 14.835    | 0.022 | 0.097          | 0.425  | 0.018  | -3.724 - 4.574   | 0.840  |                |
|       | FIA        | 3.212      | 0.230  | -0.572 - 6.995    | 0.094 | 0.053          |        |        |                  |        |                |
|       | OHIP-14    | -0.254     | -0.030 | -2.571 - 2.063    | 0.827 | 0.001          |        |        |                  |        |                |
|       | Tooth wear | 23.826     | 0.125  | -28.819 - 76.471  | 0.368 | 0.016          |        |        |                  |        |                |
| 61-70 | Age        | -1.938     | -0.103 | -7.712 - 3.836    | 0.502 | 0.011          |        |        |                  |        |                |
|       | Gender (M) | 1          |        | ref               |       |                |        |        |                  |        |                |
|       | Gender (F) | -8.696     | -0.082 | -41.278 - 23.885  | 0.593 | 0.007          |        |        |                  |        |                |
|       | RT         | 8.009      | 0.169  | -6.326 - 22.344   | 0.266 | 0.029          |        |        |                  |        |                |
|       | FTUs       | 9.537      | 0.194  | -5.283 - 24.357   | 0.201 | 0.038          |        |        |                  |        |                |
|       | TP         | 0.261      | 0.038  | -1.845 - 2.368    | 0.804 | 0.001          |        |        |                  |        |                |
|       | HG         | 0.205      | 0.036  | -1.569 - 1.979    | 0.817 | 0.001          |        |        |                  |        |                |
|       | PBA        | 1.547      | 0.301  | 0.042 - 3.053     | 0.044 | 0.091          | 1.547  | 0.301  | 0.042 - 3.053    | 0.044* | 0.091          |
|       | ABA        | -0.720     | -0.233 | -1.644 - 0.204    | 0.124 | 0.054          |        |        |                  |        |                |
|       | BF         | 0.034      | 0.268  | -0.004 - 0.073    | 0.076 | 0.072          |        |        |                  |        |                |
|       | MTM        | 1.463      | 0.059  | -6.093 - 9.018    | 0.698 | 0.004          |        |        |                  |        |                |
|       | FIA        | 1.683      | 0.188  | -1.023 - 4.389    | 0.217 | 0.035          |        |        |                  |        |                |
|       | OHIP-14    | -0.999     | -0.139 | -3.185 - 1.187    | 0.362 | 0.019          |        |        |                  |        |                |
|       | Tooth wear | -28.722    | -0.265 | -60.820 - 3.375   | 0.078 | 0.070          |        |        |                  |        |                |
| 71+   | Age        | 0.385      | 0.034  | -2.523 - 3.294    | 0.792 | 0.001          |        |        |                  |        |                |
|       | Gender (M) | 1          |        | ref               |       |                |        |        |                  |        |                |
|       | Gender (F) | -16.427    | -0.138 | -47.165 - 14.311  | 0.289 | 0.019          |        |        |                  |        |                |
|       | RT         | 2.717      | 0.068  | -7.721 - 13.156   | 0.604 | 0.005          |        |        |                  |        |                |
|       | FTUs       | -0.099     | -0.002 | -12.260 - 12.061  | 0.987 | 0.000          |        |        |                  |        |                |
|       | TP         | 0.234      | 0.039  | -1.322 - 1.790    | 0.764 | 0.002          |        |        |                  |        |                |

|            |        |        |                  |       |       |
|------------|--------|--------|------------------|-------|-------|
| HG         | 0.613  | 0.085  | -1.270 - 2.495   | 0.517 | 0.007 |
| PBA        | 1.477  | 0.203  | -0.375 - 3.329   | 0.116 | 0.041 |
| ABA        | 1.659  | 0.106  | -2.396 - 5.714   | 0.416 | 0.011 |
| BF         | 0.030  | 0.161  | -0.018 - 0.079   | 0.217 | 0.026 |
| MTM        | 3.097  | 0.138  | -2.677 - 8.872   | 0.288 | 0.019 |
| FIA        | 1.235  | 0.136  | -1.112 - 3.582   | 0.297 | 0.018 |
| OHIP-14    | -1.113 | -0.117 | -3.571 - 1.346   | 0.369 | 0.014 |
| Tooth wear | 13.457 | 0.103  | -20.555 - 47.469 | 0.432 | 0.011 |

B: partial regression coefficient;  $\beta$ : standardized partial regression coefficient; \*  $p < 0.05$   
RT: number of remaining teeth, FTUs: functional tooth units, MP: masticatory performance, HG: handgrip strength, PBA: posterior bite area, ABA: anterior bite area, BF: bite force, MMT: masseter muscle thickness

Table S2. Multiple linear regression analysis of factors associated with food intake ability

|       |            | Univariate |        |                 |       |                | Multivariate |        |                 |        |                |
|-------|------------|------------|--------|-----------------|-------|----------------|--------------|--------|-----------------|--------|----------------|
|       |            | B          | β      | 95% CI          | p     | R <sup>2</sup> | B            | β      | 95% CI          | p      | R <sup>2</sup> |
| 20-45 | Age        | 0.029      | 0.073  | -0.084 - 0.141  | 0.609 | 0.005          |              |        |                 |        |                |
|       | Gender (M) | 1          |        | ref             |       |                |              |        |                 |        |                |
|       | Gender (F) | -1.323     | -0.228 | -2.943 - 0.297  | 0.107 | 0.052          |              |        |                 |        |                |
|       | RT         | -0.178     | -0.097 | -0.706 - 0.349  | 0.500 | 0.009          |              |        |                 |        |                |
|       | FTUs       | -0.395     | -0.108 | -1.433 - 0.644  | 0.449 | 0.012          |              |        |                 |        |                |
|       | TP         | 0.018      | 0.068  | -0.058 - 0.095  | 0.634 | 0.005          |              |        |                 |        |                |
|       | HG         | 0.091      | 0.327  | 0.016 - 0.167   | 0.019 | 0.107          | 0.057        | 0.203  | -0.043 - 0.156  | 0.257  | 0.329          |
|       | PBA        | 0.044      | 0.194  | -0.020 - 0.108  | 0.172 | 0.038          |              |        |                 |        |                |
|       | ABA        | 0.188      | 0.153  | -0.161 - 0.536  | 0.285 | 0.023          |              |        |                 |        |                |
|       | BF         | 0.002      | 0.229  | 0.000 - 0.003   | 0.106 | 0.053          |              |        |                 |        |                |
|       | MTM        | 0.319      | 0.291  | 0.017 - 0.620   | 0.039 | 0.084          | 0.198        | 0.180  | -0.194 - 0.589  | 0.315  |                |
|       | MP         | 0.007      | 0.128  | -0.008 - 0.022  | 0.369 | 0.016          |              |        |                 |        |                |
|       | OHIP-14    | -0.208     | -0.449 | -0.326 - -0.089 | 0.001 | 0.201          | -0.216       | -0.468 | -0.328 - -0.104 | <.001* |                |
|       | Tooth wear | -1.796     | -0.120 | -6.050 - 2.458  | 0.400 | 0.014          |              |        |                 |        |                |
| 45-60 | Age        | -0.148     | -0.126 | -0.472 - 0.176  | 0.365 | 0.016          |              |        |                 |        |                |
|       | Gender (M) | 1          |        | ref             |       |                |              |        |                 |        |                |
|       | Gender (F) | -0.223     | -0.023 | -2.922 - 2.477  | 0.869 | 0.001          |              |        |                 |        |                |
|       | RT         | 1.241      | 0.268  | 0.000 - 2.483   | 0.050 | 0.072          |              |        |                 |        |                |
|       | FTUs       | 2.982      | 0.447  | 1.321 - 4.644   | 0.001 | 0.200          | 4.378        | 0.656  | 1.758 - 6.997   | 0.002* | 0.447          |
|       | TP         | 0.115      | 0.248  | -0.010 - 0.241  | 0.071 | 0.061          |              |        |                 |        |                |
|       | HG         | 0.072      | 0.129  | -0.083 - 0.227  | 0.353 | 0.017          |              |        |                 |        |                |
|       | PBA        | 0.101      | 0.251  | -0.007 - 0.209  | 0.067 | 0.063          |              |        |                 |        |                |
|       | ABA        | 0.144      | 0.174  | -0.083 - 0.372  | 0.209 | 0.030          |              |        |                 |        |                |
|       | BF         | 0.004      | 0.315  | 0.001 - 0.007   | 0.020 | 0.099          | 0.001        | 0.107  | -0.001 - 0.004  | 0.356  |                |
|       | MTM        | 0.042      | 0.023  | -0.471 - 0.556  | 0.870 | 0.001          |              |        |                 |        |                |
|       | MP         | 0.016      | 0.230  | -0.003 - 0.036  | 0.094 | 0.053          |              |        |                 |        |                |
|       | OHIP-14    | -0.252     | -0.422 | -0.402 - -0.101 | 0.001 | 0.178          | -0.262       | -0.440 | -0.394 - -0.130 | <.001* |                |
|       | Tooth wear | 2.054      | 0.151  | -1.700 - 5.809  | 0.277 | 0.023          |              |        |                 |        |                |
| 61-70 | Age        | -0.456     | -0.216 | -1.088 - 0.177  | 0.154 | 0.047          |              |        |                 |        |                |
|       | Gender (M) | 1          |        | ref             |       |                |              |        |                 |        |                |

|     |            |        |        |                 |       |       |        |        |                 |        |       |
|-----|------------|--------|--------|-----------------|-------|-------|--------|--------|-----------------|--------|-------|
|     | Gender (F) | -2.185 | -0.184 | -5.771 - 1.402  | 0.226 | 0.034 |        |        |                 |        |       |
|     | RT         | 1.049  | 0.199  | -0.542 - 2.641  | 0.191 | 0.040 |        |        |                 |        |       |
|     | FTUs       | 1.247  | 0.227  | -0.395 - 2.889  | 0.133 | 0.052 |        |        |                 |        |       |
|     | TP         | 0.347  | 0.454  | 0.138 - 0.557   | 0.002 | 0.206 | 0.168  | 0.220  | 0.002 - 0.335   | 0.047* | 0.691 |
|     | HG         | 0.239  | 0.370  | 0.054 - 0.423   | 0.012 | 0.137 | 0.027  | 0.041  | -0.150 - 0.203  | 0.761  |       |
|     | PBA        | 0.080  | 0.139  | -0.095 - 0.254  | 0.361 | 0.019 |        |        |                 |        |       |
|     | ABA        | -0.012 | -0.036 | -0.118 - 0.094  | 0.816 | 0.001 |        |        |                 |        |       |
|     | BF         | 0.003  | 0.175  | -0.002 - 0.007  | 0.251 | 0.031 |        |        |                 |        |       |
|     | MTM        | 0.769  | 0.280  | -0.042 - 1.580  | 0.063 | 0.078 |        |        |                 |        |       |
|     | MP         | 0.021  | 0.188  | -0.013 - 0.055  | 0.217 | 0.035 |        |        |                 |        |       |
|     | OHIP-14    | -0.639 | -0.797 | -0.788 - -0.490 | <.001 | 0.635 | -0.573 | -0.715 | -0.732 - -0.414 | <.001* |       |
|     | Tooth wear | -0.778 | -0.064 | -4.486 - 2.931  | 0.674 | 0.004 |        |        |                 |        |       |
| 71+ | Age        | -0.012 | -0.010 | -0.332 - 0.308  | 0.940 | 0.000 |        |        |                 |        |       |
|     | Gender (M) | 1      |        | ref             |       |       |        |        |                 |        |       |
|     | Gender (F) | -4.209 | -0.321 | -7.441 - -0.977 | 0.012 | 0.103 | -3.674 | -0.280 | -7.627 - 0.279  | 0.068  | 0.310 |
|     | RT         | 0.596  | 0.135  | -0.544 - 1.736  | 0.300 | 0.018 |        |        |                 |        |       |
|     | FTUs       | 0.907  | 0.177  | -0.409 - 2.223  | 0.173 | 0.031 |        |        |                 |        |       |
|     | TP         | 0.040  | 0.061  | -0.131 - 0.211  | 0.642 | 0.004 |        |        |                 |        |       |
|     | HG         | 0.219  | 0.274  | 0.019 - 0.419   | 0.032 | 0.075 | -0.020 | -0.025 | -0.265 - 0.226  | 0.872  |       |
|     | PBA        | 0.182  | 0.228  | -0.021 - 0.384  | 0.078 | 0.052 |        |        |                 |        |       |
|     | ABA        | 0.218  | 0.126  | -0.227 - 0.663  | 0.332 | 0.016 |        |        |                 |        |       |
|     | BF         | 0.004  | 0.208  | -0.001 - 0.010  | 0.108 | 0.043 |        |        |                 |        |       |
|     | MTM        | 0.408  | 0.166  | -0.224 - 1.041  | 0.201 | 0.028 |        |        |                 |        |       |
|     | MP         | 0.015  | 0.136  | -0.013 - 0.043  | 0.297 | 0.018 |        |        |                 |        |       |
|     | OHIP-14    | -0.513 | -0.491 | -0.751 - -0.276 | <.001 | 0.241 | -0.483 | -0.462 | -0.720 - -0.246 | <.001* |       |
|     | Tooth wear | -1.260 | -0.087 | -5.006 - 2.486  | 0.504 | 0.008 |        |        |                 |        |       |

B: partial regression coefficient;  $\beta$ : standardized partial regression coefficient; \*  $p < 0.05$

RT: number of remaining teeth, FTUs: functional tooth units, MP: masticatory performance, HG: handgrip strength, PBA: posterior bite area, ABA: anterior bite area, BF: bite force, MMT: masseter muscle thickness
